# Supplementary material for: Optical and hygroscopic properties of black carbon influenced by particle microphysics at the top of the anthropogenically polluted boundary layer
Source: Copernicus journal article supplement (doi:10.5194/acp-21-681-2021), 2021-01-18
Supplement: Supplementary file 1 [file acp-21-681-2021-supplement.pdf]

Supplement of Atmos. Chem. Phys., 21, 681–694, 2021  
<https://doi.org/10.5194/acp-21-681-2021-supplement>  
© Author(s) 2021. This work is distributed under  
the Creative Commons Attribution 4.0 License.

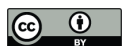

*Supplement of*

## **Optical and hygroscopic properties of black carbon influenced by particle microphysics at the top of the anthropogenically polluted boundary layer**

**Shuo Ding et al.**

*Correspondence to:* Dantong Liu ([dantongliu@zju.edu.cn](mailto:dantongliu@zju.edu.cn)) and Deping Ding ([zytddp@vip.sina.com](mailto:zytddp@vip.sina.com))

The copyright of individual parts of the supplement might differ from the CC BY 4.0 License.

## Supplements

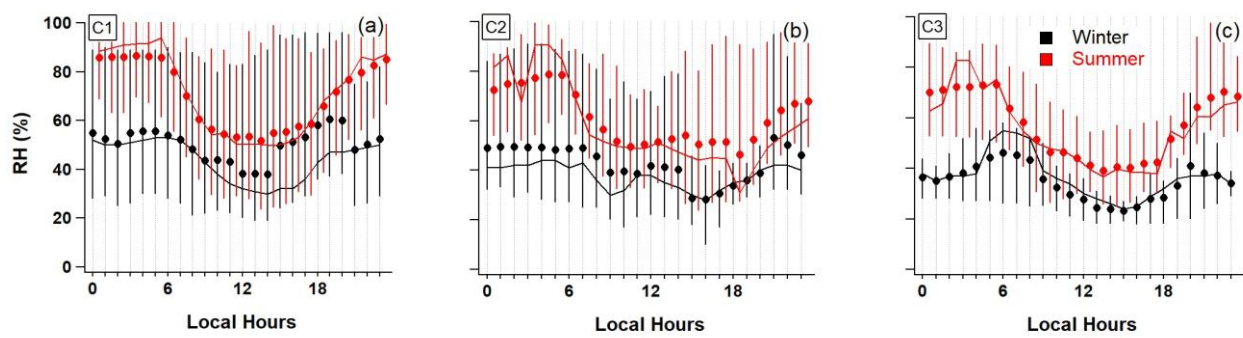

Fig. S1. Diurnal variations of RH for the three PBL types in both seasons. The solid circles, lines and whiskers denote the mean, median, 25<sup>th</sup>, 75<sup>th</sup> percentile respectively.

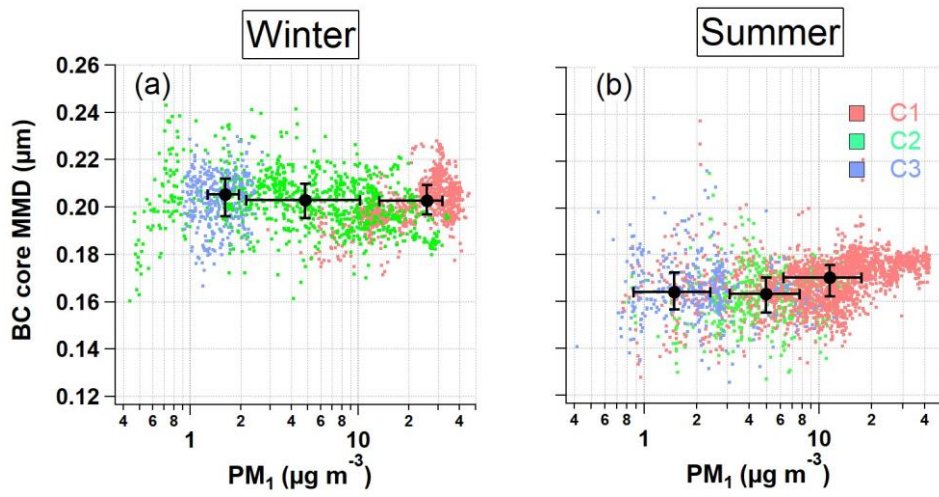

Fig. S2. BC core MMD as a function of PM<sub>1</sub> in winter (a) and summer (b) for the three PBL types, with solid circles, whiskers denoting the median, 25<sup>th</sup>, 75<sup>th</sup> percentiles.

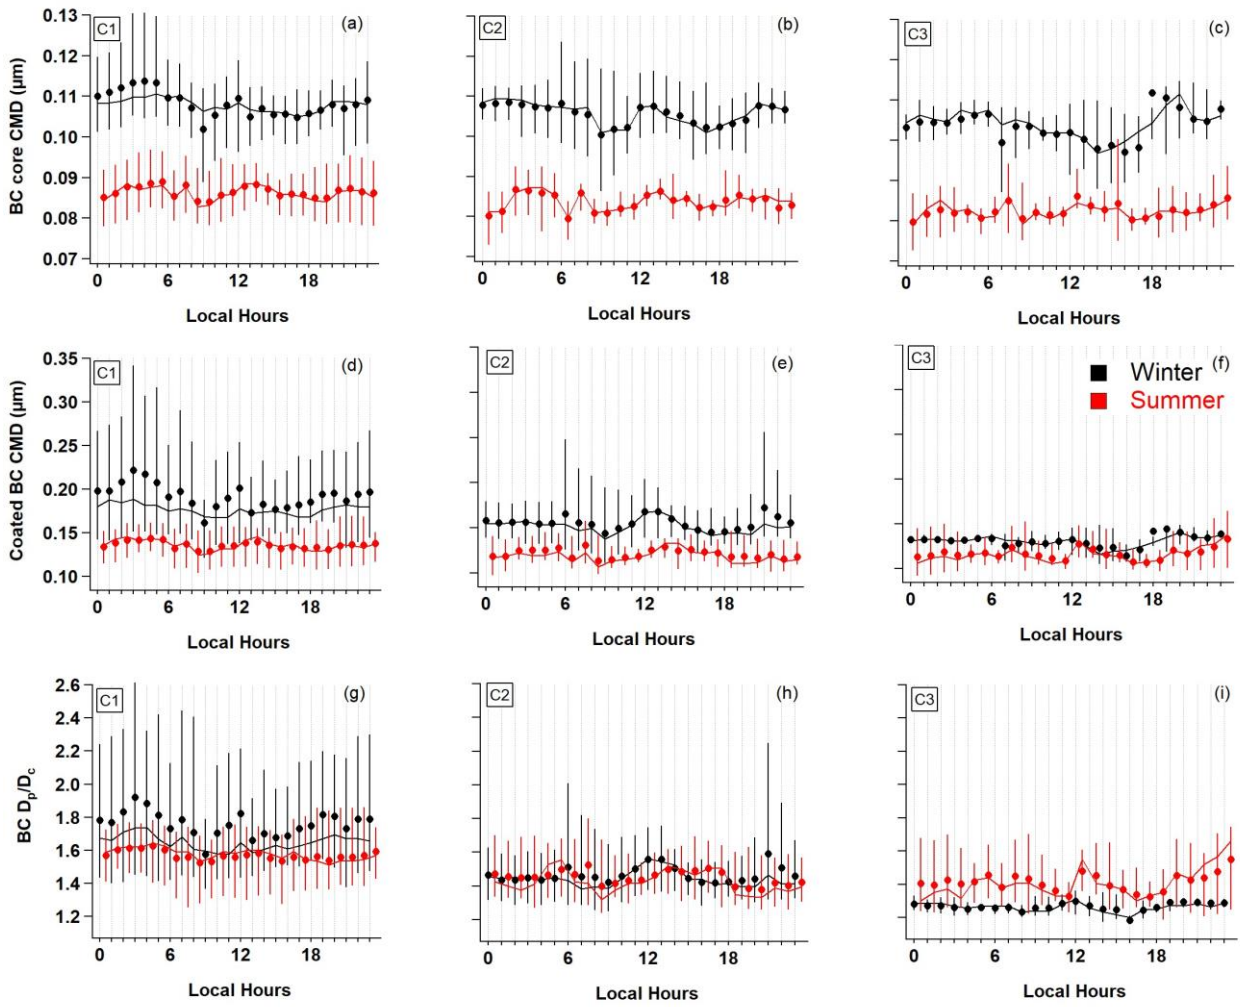

Fig. S3. Diurnal variations of BC core CMD (a-c), BC coated CMD (d-f) and BC  $D_p/D_c$  (g-i) for the three PBL types in both seasons. The solid circles, lines and whiskers denote the mean, median, 25<sup>th</sup>, 75<sup>th</sup> percentile respectively.

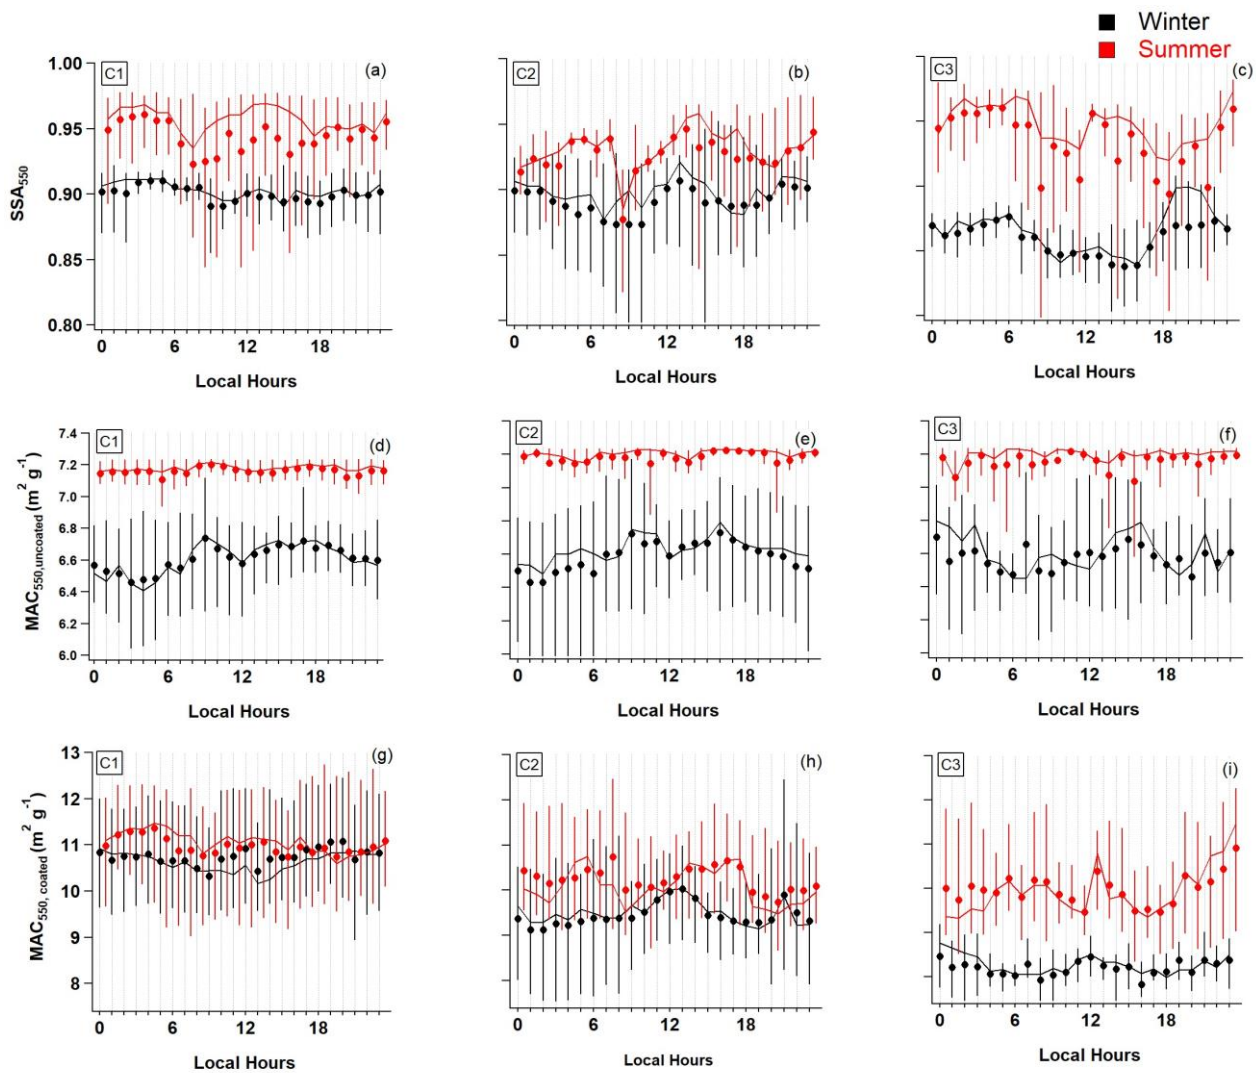

Fig. S4. Diurnal variation of SSA<sub>550</sub> (a-c), MAC<sub>550,uncoated</sub> (d-f) and MAC<sub>550,coated</sub> (g-i) for the three PBL types in both seasons. The solid circles, lines and whiskers denote the mean, median, 25<sup>th</sup>, 75<sup>th</sup> percentile respectively.

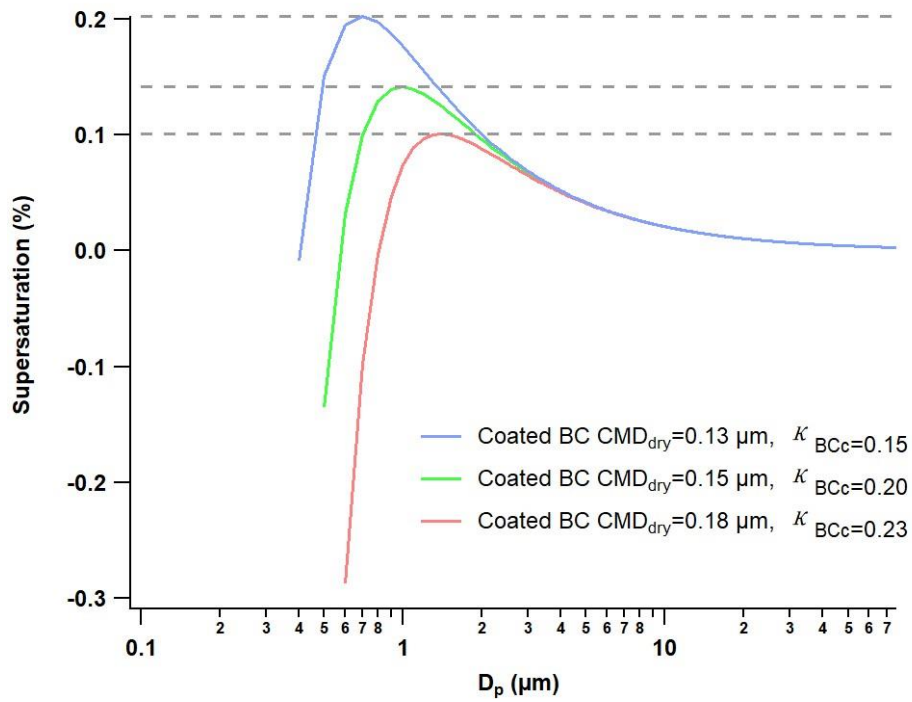

Fig. S5. Examples of critical supersaturation calculation for the three typical BC containing particles, using the coated BC CMD and corresponding  $\kappa_{\text{BCc}}$  as inputs. The dashed line denotes the critical supersaturation to activate the BC with given CMD and  $\kappa_{\text{BCc}}$ .
